# Supplementary material for: Enzyme-free and sensitive method for single-stranded nucleic acid detection based on CHA and HCR
Source: Royal Society of Chemistry journal article supplement (doi:10.1039/d3ay00975k), 2023-01-01
Supplement: d3ay00975k1.pdf [file d3ay00975k1.pdf]

**Enzyme-free and sensitive method for single-stranded nucleic acid detection  
based on CHA and HCR**

Xiaolong Chen <sup>a</sup>, Chaowang Huang <sup>a</sup>, Fuping Nie <sup>b,\*</sup>, Mingdong Hu <sup>a,c,\*</sup>.

<sup>a</sup> Department of Geriatrics and Special Services Medicine, Xinqiao Hospital, Army Military Medical University, Chongqing 400037, China.

<sup>b</sup> State Key Laboratory of Cattle Diseases Detection (Chongqing), Chongqing Customs Technology Center, Chongqing, 400020, PR China.

<sup>c</sup> Department of Health Management, Xinqiao Hospital, Army Military Medical University, Chongqing 400037, China.

\*Corresponding author: Department of Geriatrics and Special Services Medicine, Xinqiao Hospital, Army Military Medical University, Shapingba, Chongqing 400037, China. Email: humingdong@tmmu.edu.cn.

**Table S1.** The formula of 15% polypropylene gel.

| <b>Project</b>     | <b>Volume</b> |
|--------------------|---------------|
| ddH <sub>2</sub> O | 3.75          |
| 30%Acr-Bis (29:1)  | 7.5           |
| TBE buffer (4×)    | 3.75          |
| 10% APS            | 0.15          |
| TEMED              | 0.006         |
